# Supplementary material for: Traffic-Related High Sleep Disturbance in the LIFE-Adult Cohort Study: A Comparison to the WHO Exposure-Response-Curves
Source: MDPI journal article supplement (doi:10.3390/ijerph20064903), 2023-03-10
Supplement: s1 [file s1]

**Table S1.** Description of study population with regard to HSD from road, rail and air traffic.

|                         |          | Road    |      |     |     | Rail    |      |     |      | Air     |      |     |     |
|-------------------------|----------|---------|------|-----|-----|---------|------|-----|------|---------|------|-----|-----|
|                         |          | Not HSD |      | HSD |     | Not HSD |      | HSD |      | Not HSD |      | HSD |     |
|                         |          | n       | %    | n   | %   | n       | %    | n   | %    | n       | %    | n   | %   |
| Total                   |          | 5002    | 97.3 | 138 | 2.7 | 4908    | 98.6 | 71  | 1.4  | 4931    | 98.0 | 101 | 2.0 |
| Sex                     |          |         |      |     |     |         |      |     |      |         |      |     |     |
|                         | Females  | 2623    | 96.9 | 85  | 3.1 | 2343    | 98.9 | 27  | 1.1  | 2348    | 97.7 | 56  | 2.3 |
|                         | Males    | 2379    | 97.8 | 53  | 2.2 | 2565    | 98.3 | 44  | 1.7  | 2583    | 98.3 | 45  | 1.7 |
| Age (years) at baseline |          |         |      |     |     |         |      |     |      |         |      |     |     |
|                         | 18-24    | 0       | 0    | 0   | 0   | 0       | 0    | 0   | 0    | 0       | 0    | 0   | 0   |
|                         | 25-29    | 35      | 100  | 0   | 0   | 33      | 97.1 | 1   | <0.1 | 34      | 100  | 0   | 0   |
|                         | 30-34    | 65      | 98.5 | 1   | 1.5 | 66      | 98.5 | 1   | 1.5  | 66      | 98.5 | 1   | 1.5 |
|                         | 35-39    | 65      | 95.6 | 3   | 4.4 | 67      | 100  | 0   | 0    | 67      | 98.5 | 1   | 1.5 |
|                         | 40-44    | 76      | 95.0 | 4   | 5.0 | 76      | 96.2 | 3   | 3.8  | 79      | 98.8 | 1   | 1.3 |
|                         | 45-49    | 445     | 97.2 | 13  | 2.8 | 441     | 98.7 | 6   | 1.3  | 448     | 98.7 | 6   | 1.3 |
|                         | 50-54    | 678     | 96.4 | 25  | 3.6 | 685     | 98.8 | 8   | 1.2  | 676     | 97.0 | 21  | 3.0 |
|                         | 55-59    | 611     | 97.1 | 18  | 2.9 | 609     | 98.7 | 8   | 1.3  | 606     | 97.0 | 19  | 3.0 |
|                         | 60-64    | 540     | 97.5 | 14  | 2.5 | 530     | 98.1 | 10  | 1.9  | 536     | 98.2 | 10  | 1.8 |
|                         | 65-69    | 697     | 98.2 | 13  | 1.8 | 673     | 97.8 | 15  | 2.2  | 682     | 98.3 | 12  | 1.7 |
|                         | 70-74    | 647     | 96.9 | 21  | 3.1 | 632     | 98.8 | 8   | 1.3  | 635     | 98.3 | 11  | 1.7 |
|                         | 75-80    | 720     | 97.6 | 18  | 2.4 | 695     | 99.0 | 7   | 1.0  | 703     | 98.5 | 11  | 1.5 |
|                         | 80+      | 423     | 98.1 | 8   | 1.9 | 401     | 99   | 4   | 1.0  | 399     | 98.0 | 8   | 2.0 |
| Socioeconomic class     |          |         |      |     |     |         |      |     |      |         |      |     |     |
|                         | Low      | 763     | 96.3 | 29  | 3.7 | 753     | 98.0 | 15  | 2.0  | 753     | 98.0 | 15  | 2.0 |
|                         | Moderate | 3053    | 97.3 | 86  | 2.7 | 2980    | 98.5 | 45  | 1.5  | 3002    | 97.9 | 64  | 2.1 |
|                         | High     | 1179    | 98.1 | 23  | 1.9 | 1168    | 99.1 | 11  | 0.9  | 1169    | 98.2 | 22  | 1.8 |
|                         | Missings | 7       |      | 0   |     | 7       |      | 0   |      | 7       |      | 0   |     |

**Table S2.** Example for % highly sleep disturbed (HSD) from railway traffic noise for the LIFE-Adult study and the WHO Review by Basner & McGuire 2018 [14].

| <b>L<sub>night</sub></b> | <b>%HSD from rail traffic noise</b> |                   |
|--------------------------|-------------------------------------|-------------------|
|                          | <b>WHO</b>                          | <b>LIFE-Adult</b> |
| 35 dB                    | . <sup>1</sup>                      | 1                 |
| 45 dB                    | 3                                   | 1                 |
| 55 dB                    | 11                                  | 4                 |
| 65 dB                    | 26                                  | 9                 |

<sup>1</sup> The WHO models had a noise level limit of 40 dB

**Table S3.** Example for % highly sleep disturbed (HSD) from traffic noise for the LIFE-Adult study (using second-order polynomial models derived from logistic regression ORs) and the WHO Review by Basner & McGuire 2018 [14].

| <b>L<sub>den</sub></b> | <b>Road traffic noise</b> |                             |                        | <b>Railway traffic noise</b> |                             |                        | <b>Aircraft traffic noise</b> |                             |                        |
|------------------------|---------------------------|-----------------------------|------------------------|------------------------------|-----------------------------|------------------------|-------------------------------|-----------------------------|------------------------|
|                        | WHO<br>Review             | LIFE-Adult<br>(prevalence)* | LIFE-Adult<br>(odds)** | WHO<br>Review                | LIFE-Adult<br>(prevalence)* | LIFE-Adult<br>(odds)** | WHO<br>Review                 | LIFE-Adult<br>(prevalence)* | LIFE-Adult<br>(odds)** |
| <b>35 dB</b>           | -                         | 1                           | 1                      |                              | 2                           | 3                      |                               | 2                           | 5                      |
| <b>45 dB</b>           | 3                         | 2                           | 1                      | 3                            | 1                           | 0                      | 15                            | 32                          | 32                     |
| <b>55 dB</b>           | 6                         | 5                           | 4                      | 11                           | 4                           | 4                      | 26                            | 36                          | 47                     |
| <b>65 dB</b>           | 12                        | 10                          | 11                     | 26                           | 10                          | 15                     | 40                            | - <sup>1</sup>              | - <sup>1</sup>         |

\*second-order polynomial equations obtained directly from original values

\*\*second-order polynomial equations obtained from predicted values coming from logistic regression, same as the methodology used in the WHO review

<sup>1</sup> None of the participants in the LIFE Adult study were exposed to aircraft noise levels of 65 dB and more.

**Figure S1:** Official noise map of the city of Leipzig for 2012 ([https://static.leipzig.de/fileadmin/mediendatenbank/leipzig-de/Stadt/02.3\\_Dez3\\_Umwelt\\_Ordnung\\_Sport/36\\_Amt\\_fuer\\_Umweltschutz/Luft\\_und\\_Laerm/Laermschutz/Laermkartierung/Immissionskarten/Laerm\\_Gesamt\\_LDEN.pdf](https://static.leipzig.de/fileadmin/mediendatenbank/leipzig-de/Stadt/02.3_Dez3_Umwelt_Ordnung_Sport/36_Amt_fuer_Umweltschutz/Luft_und_Laerm/Laermschutz/Laermkartierung/Immissionskarten/Laerm_Gesamt_LDEN.pdf)).

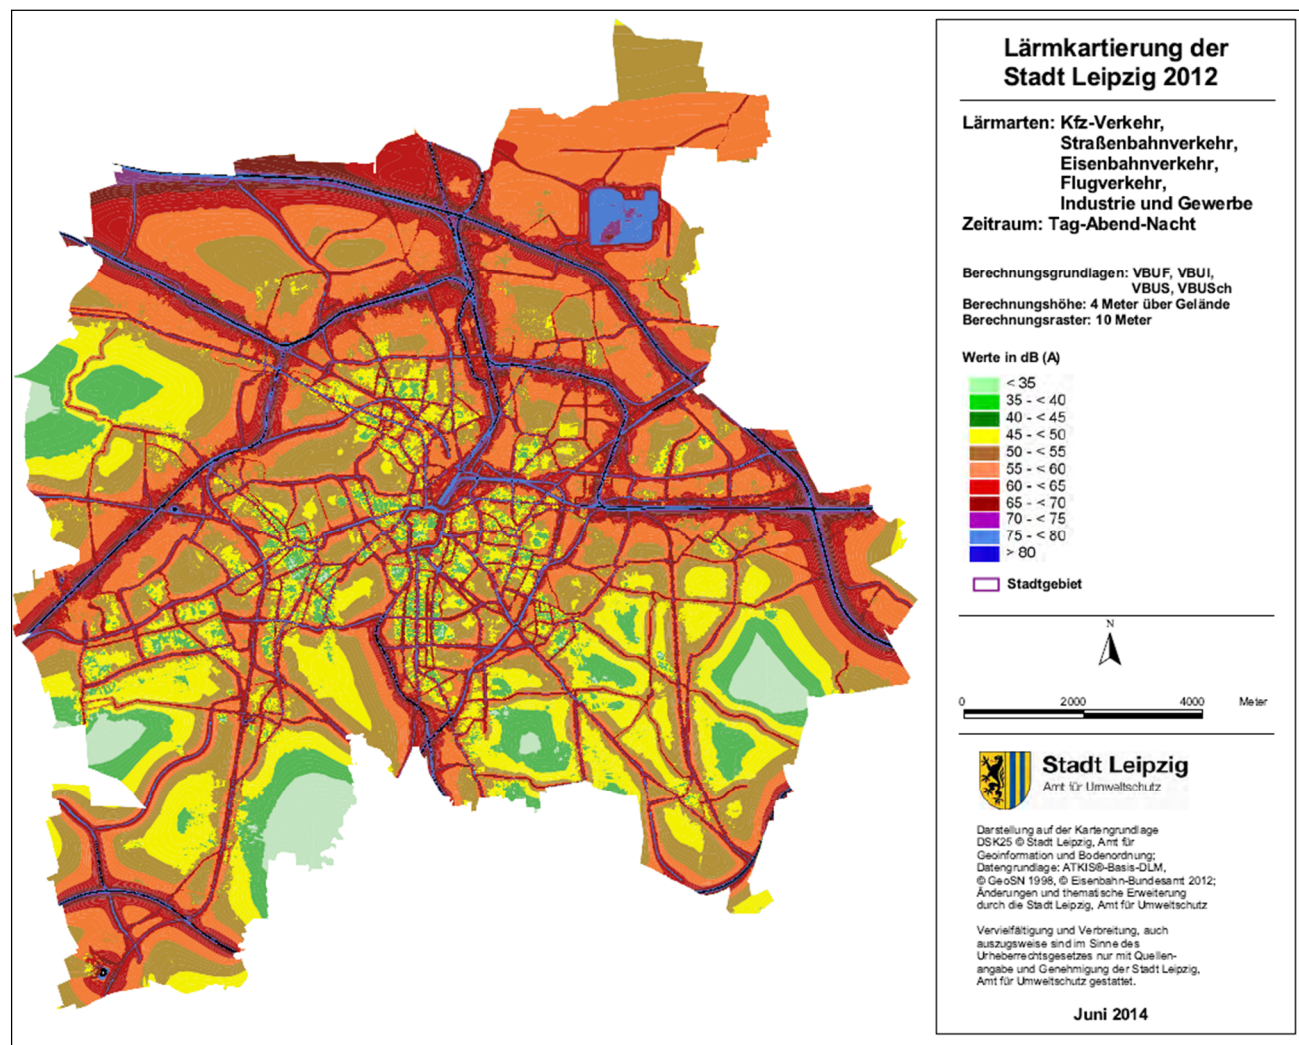

**Figure S2:** Comparison of HSD risk curves for rail traffic noise between the LIFE study and the WHO (Basner & McGuire 2018 [14]).

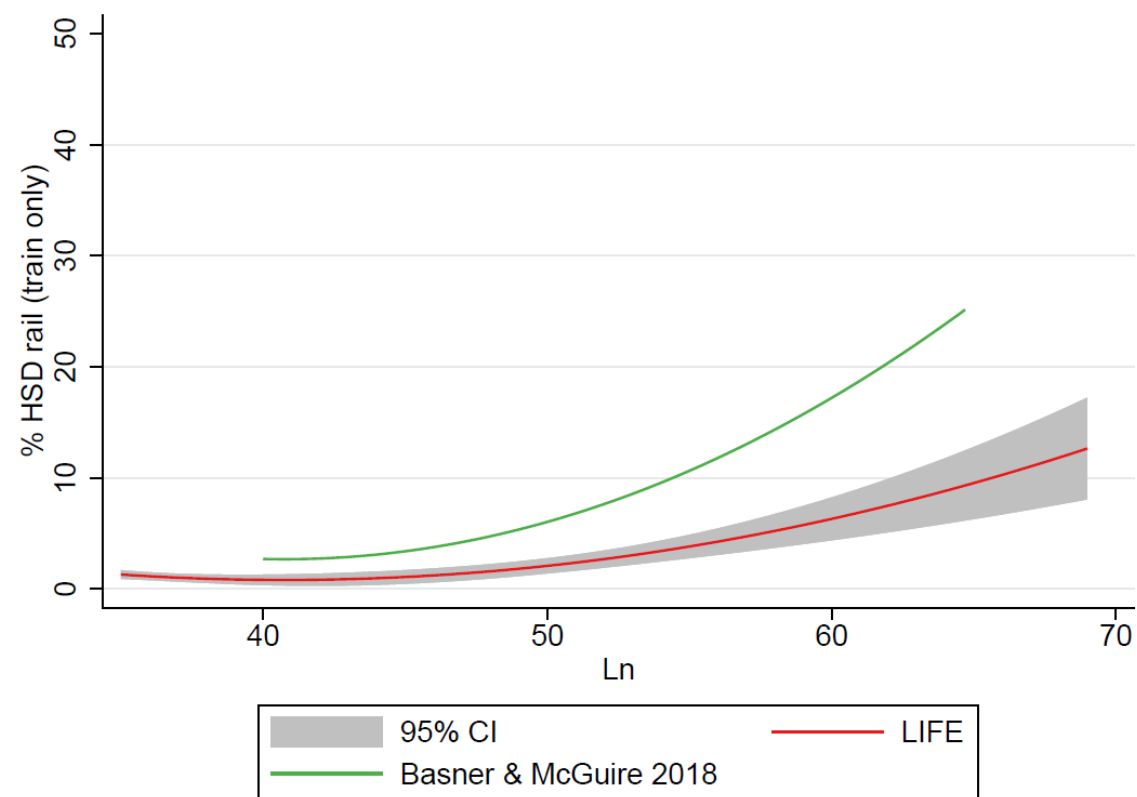

**Figure S3:** Comparison of % highly sleep disturbed (HSD) for traffic noise between the LIFE-Adult study and the WHO review by Basner & McGuire 2018 [14], using predictions from the univariate logistic regression model [52].

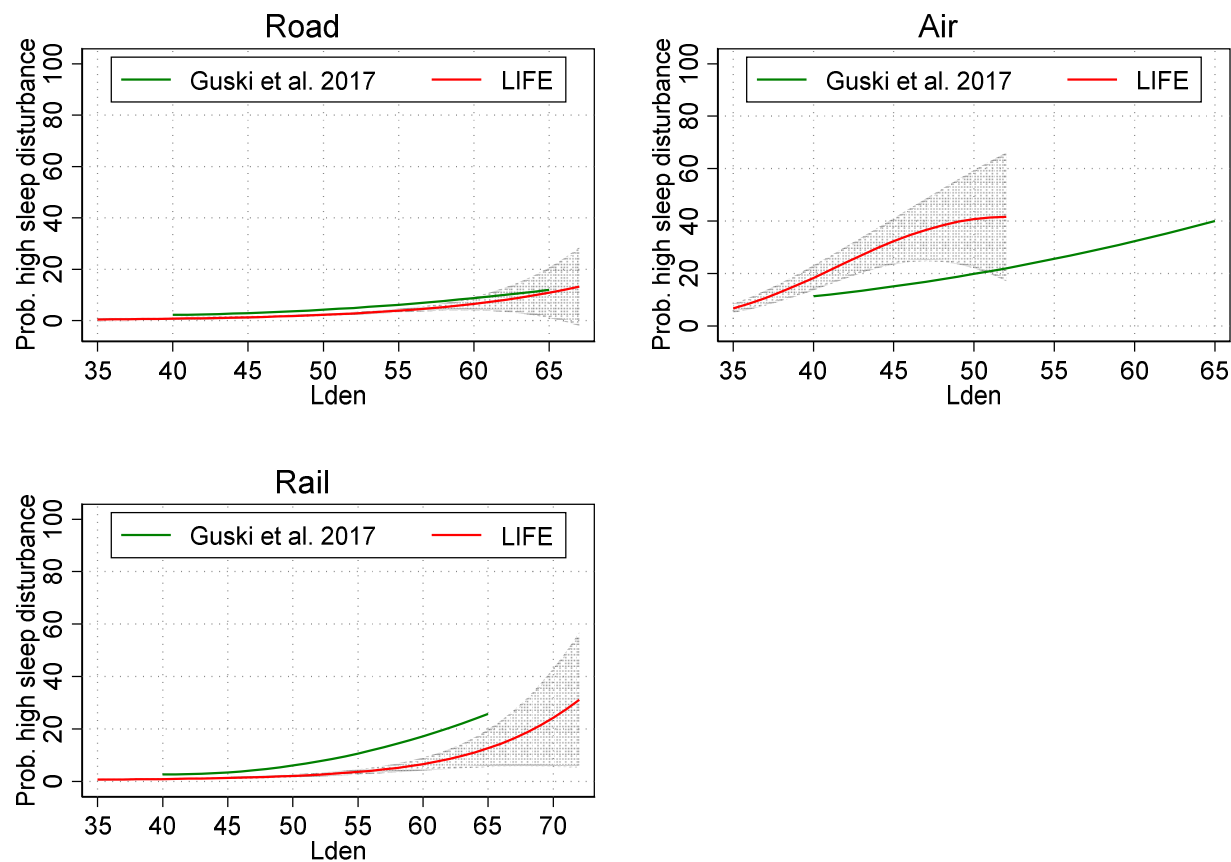

$$\text{Road\%HSD} = 27.6428 - 1.3393 \cdot L_{\text{night}} + 0.0166 \cdot L_{\text{night}}^2$$

$$\text{Rail\%HSD} = 72.4615 - 3.2453 \cdot L_{\text{night}} + 0.0362 \cdot L_{\text{night}}^2$$

$$\text{Air\%HSD} = -181,7182 + 7.3837 \cdot L_{\text{night}} - 0.0588 \cdot L_{\text{night}}^2$$
